# Supplementary material
Source: PubMed Central journal article supplement (PMC6391048)

## Supporting Information

### Isolation of Bastadin-6-*O*-Sulfate and Expedient Purifications of Bastadins-4, -5 and -6 from Extracts of *Ianthella basta*

Christopher J. Gartshore<sup>a</sup>, Mariam N. Salib<sup>a</sup>, August A. Renshaw<sup>a</sup> and Tadeusz F. Molinski<sup>a,b\*</sup>

<sup>a</sup>Department of Chemistry and Biochemistry and <sup>b</sup>Skaggs School of Pharmacy and Pharmaceutical Sciences, University of California, San Diego, La Jolla, California 92093-0358, USA

#### Table of Contents

| <i>Content</i> | <i>Page</i>                                                                                                        |
|----------------|--------------------------------------------------------------------------------------------------------------------|
| Figure S1      | <sup>1</sup> H NMR Spectrum of Bastadin-6- <i>O</i> -34-Sulfate ( <b>8</b> ) (500 MHz, CD <sub>3</sub> OD) .....S1 |
| Figure S2      | <sup>13</sup> C NMR Spectrum of <b>8</b> (125 MHz, CD <sub>3</sub> OD) .....S2                                     |
| Figure S3      | HSQC Spectrum of <b>8</b> (500 MHz, CD <sub>3</sub> OD) .....S3                                                    |
| Figure S4      | HMBC Spectrum of <b>8</b> (500 MHz, CD <sub>3</sub> OD) .....S4                                                    |
| Figure S5      | <sup>1</sup> H NMR Spectrum of <b>8</b> (500 MHz, CD <sub>3</sub> CN) .....S5                                      |
| Figure S6      | HMBC Spectrum of <b>8</b> (500 MHz, CD <sub>3</sub> CN) .....S6                                                    |
| Figure S7      | FTIR Spectrum of <b>8</b> .....S7                                                                                  |
| Figure S8      | EIMS Spectrum of <b>8</b> .....S8                                                                                  |
| Figure S9      | MALDI MS Spectrum of <b>8</b> .....S9                                                                              |
| Figure S10     | UV-vis Spectra (LCMD DAD) of <b>4</b> and <b>5</b> .....S10                                                        |

**Figure S1:**  $^1\text{H}$  NMR Spectrum of **8** (500 MHz,  $\text{CD}_3\text{OD}$ )

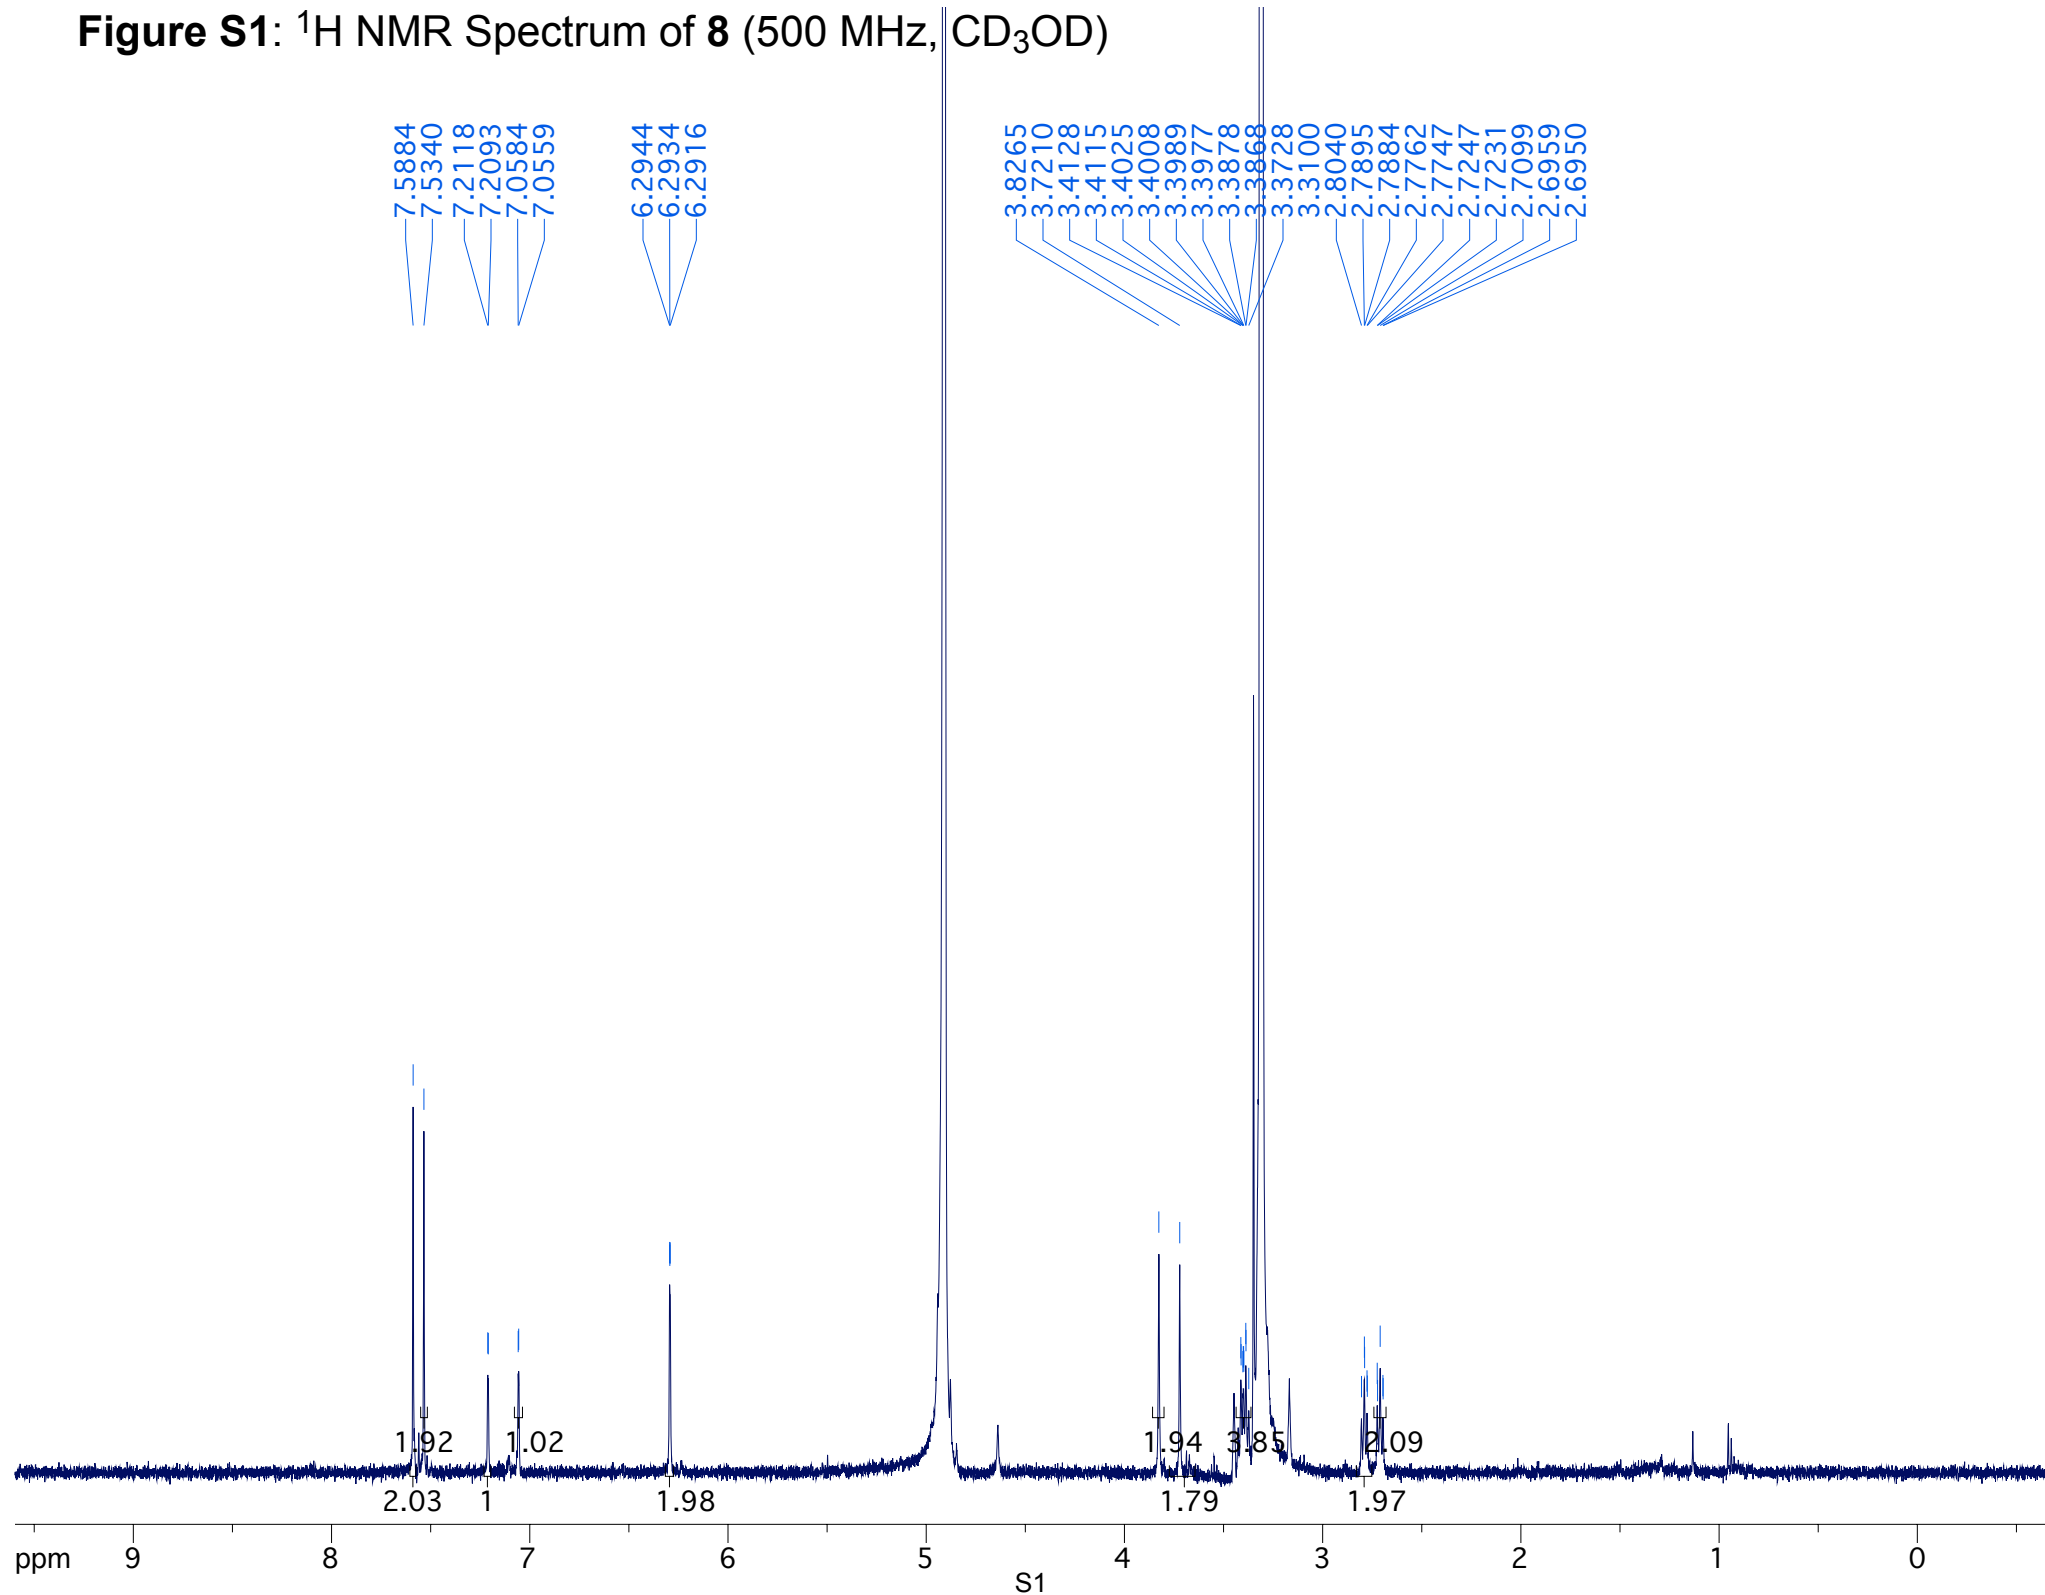

**Figure S2:**  $^{13}\text{C}$  NMR Spectrum of **8** (125 MHz,  $\text{CD}_3\text{OD}$ )

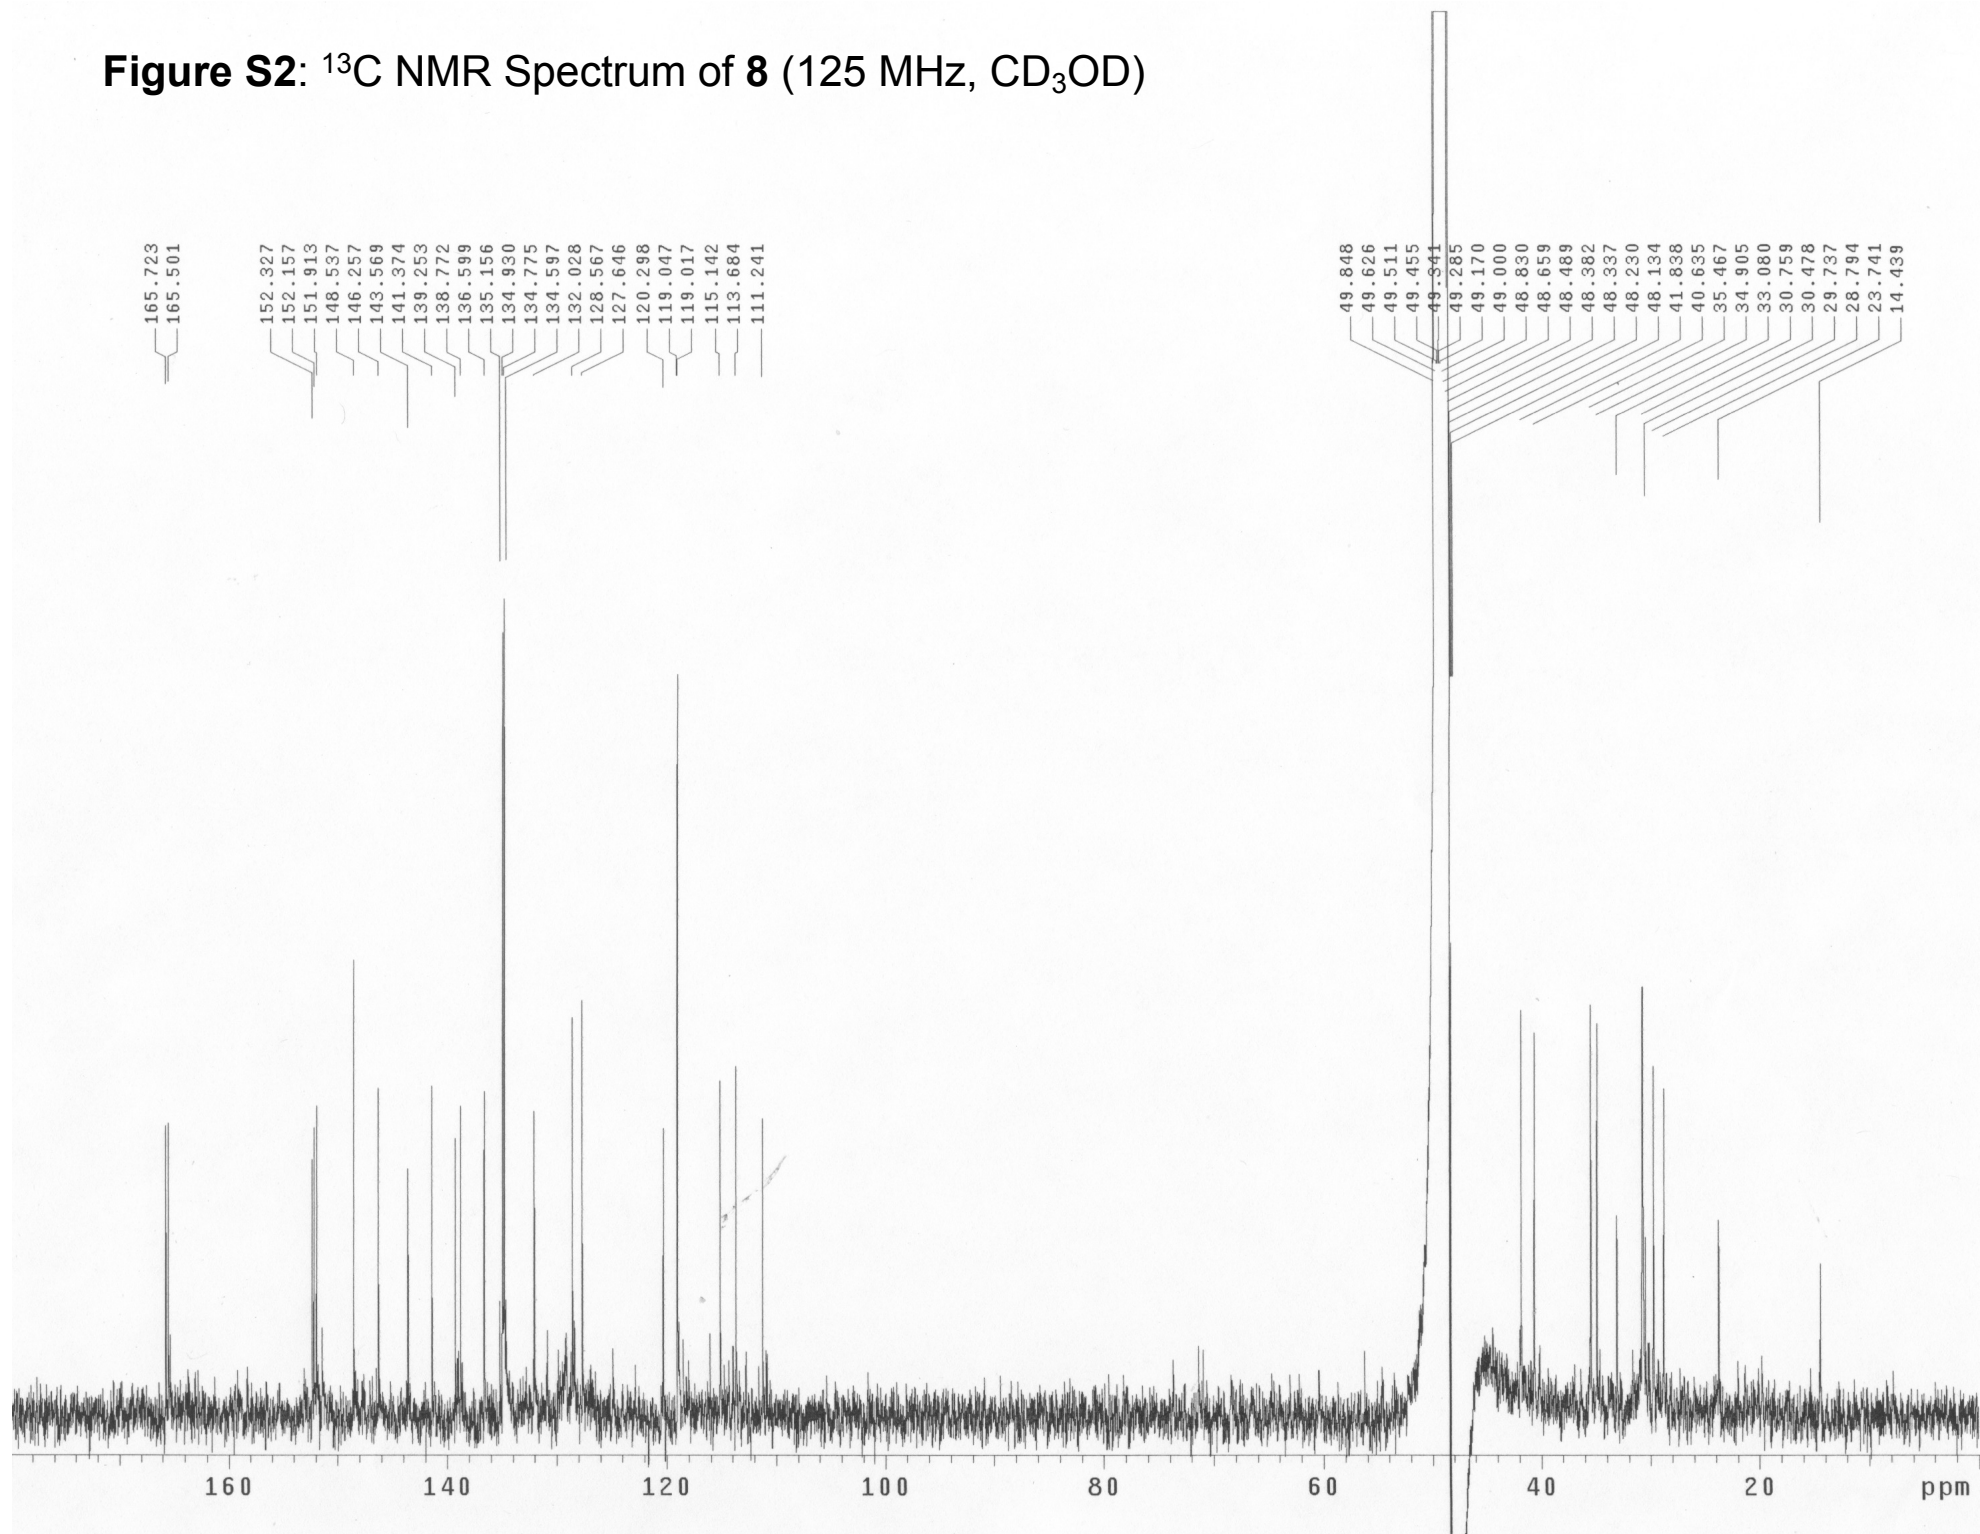

**Figure S3:** HSQC Spectrum of **8** (500 MHz, CD<sub>3</sub>OD)

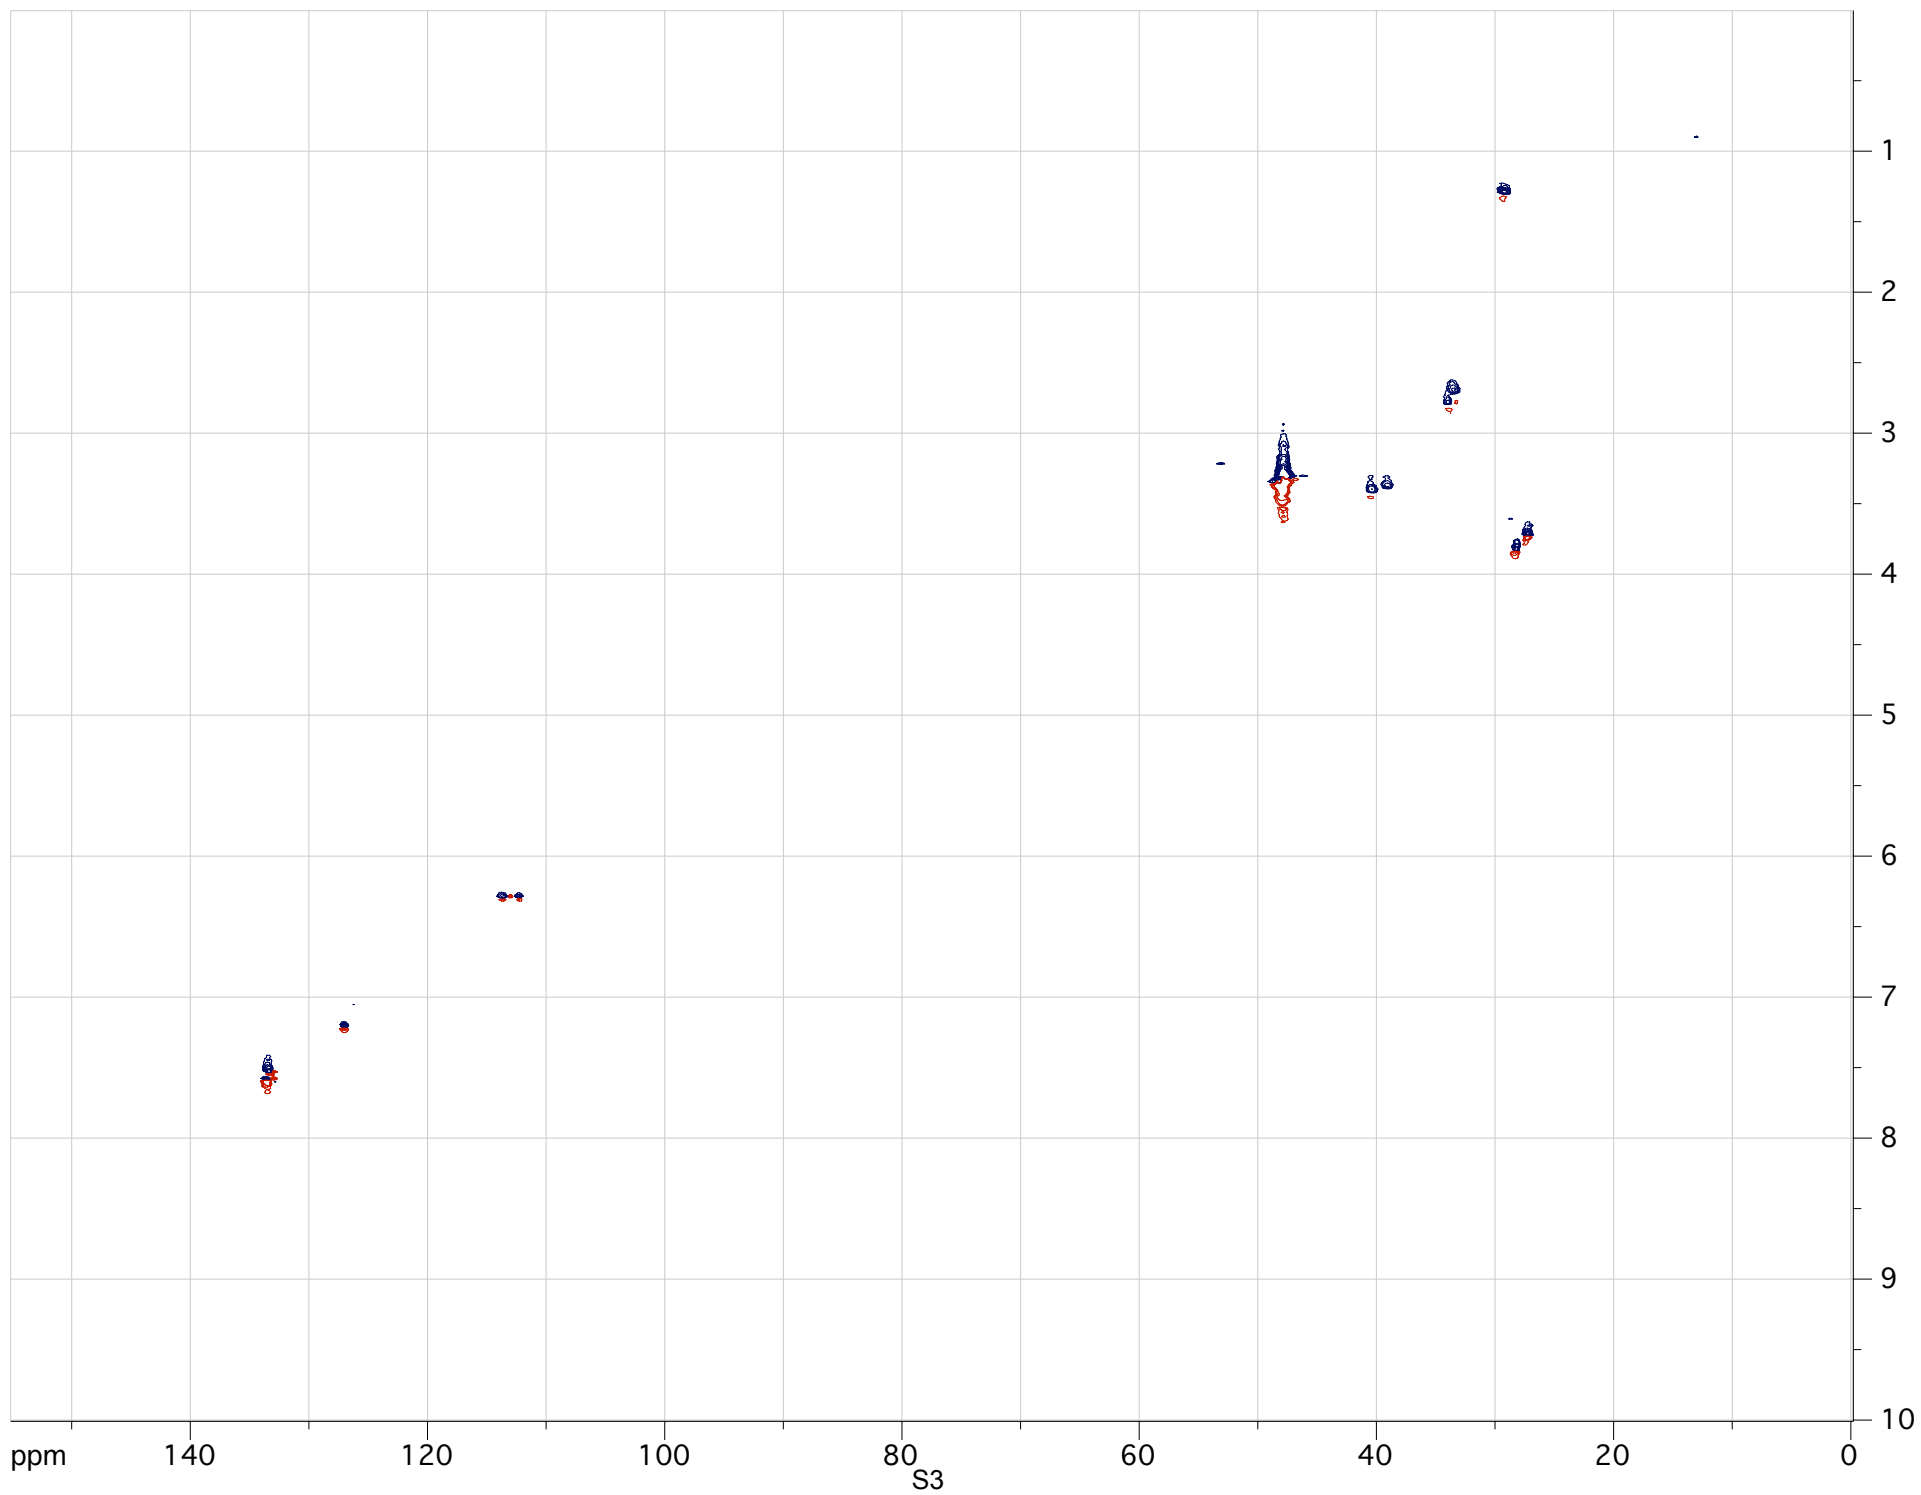

**Figure S4:** HMBC Spectrum of **8** (500 MHz, CD<sub>3</sub>OD)

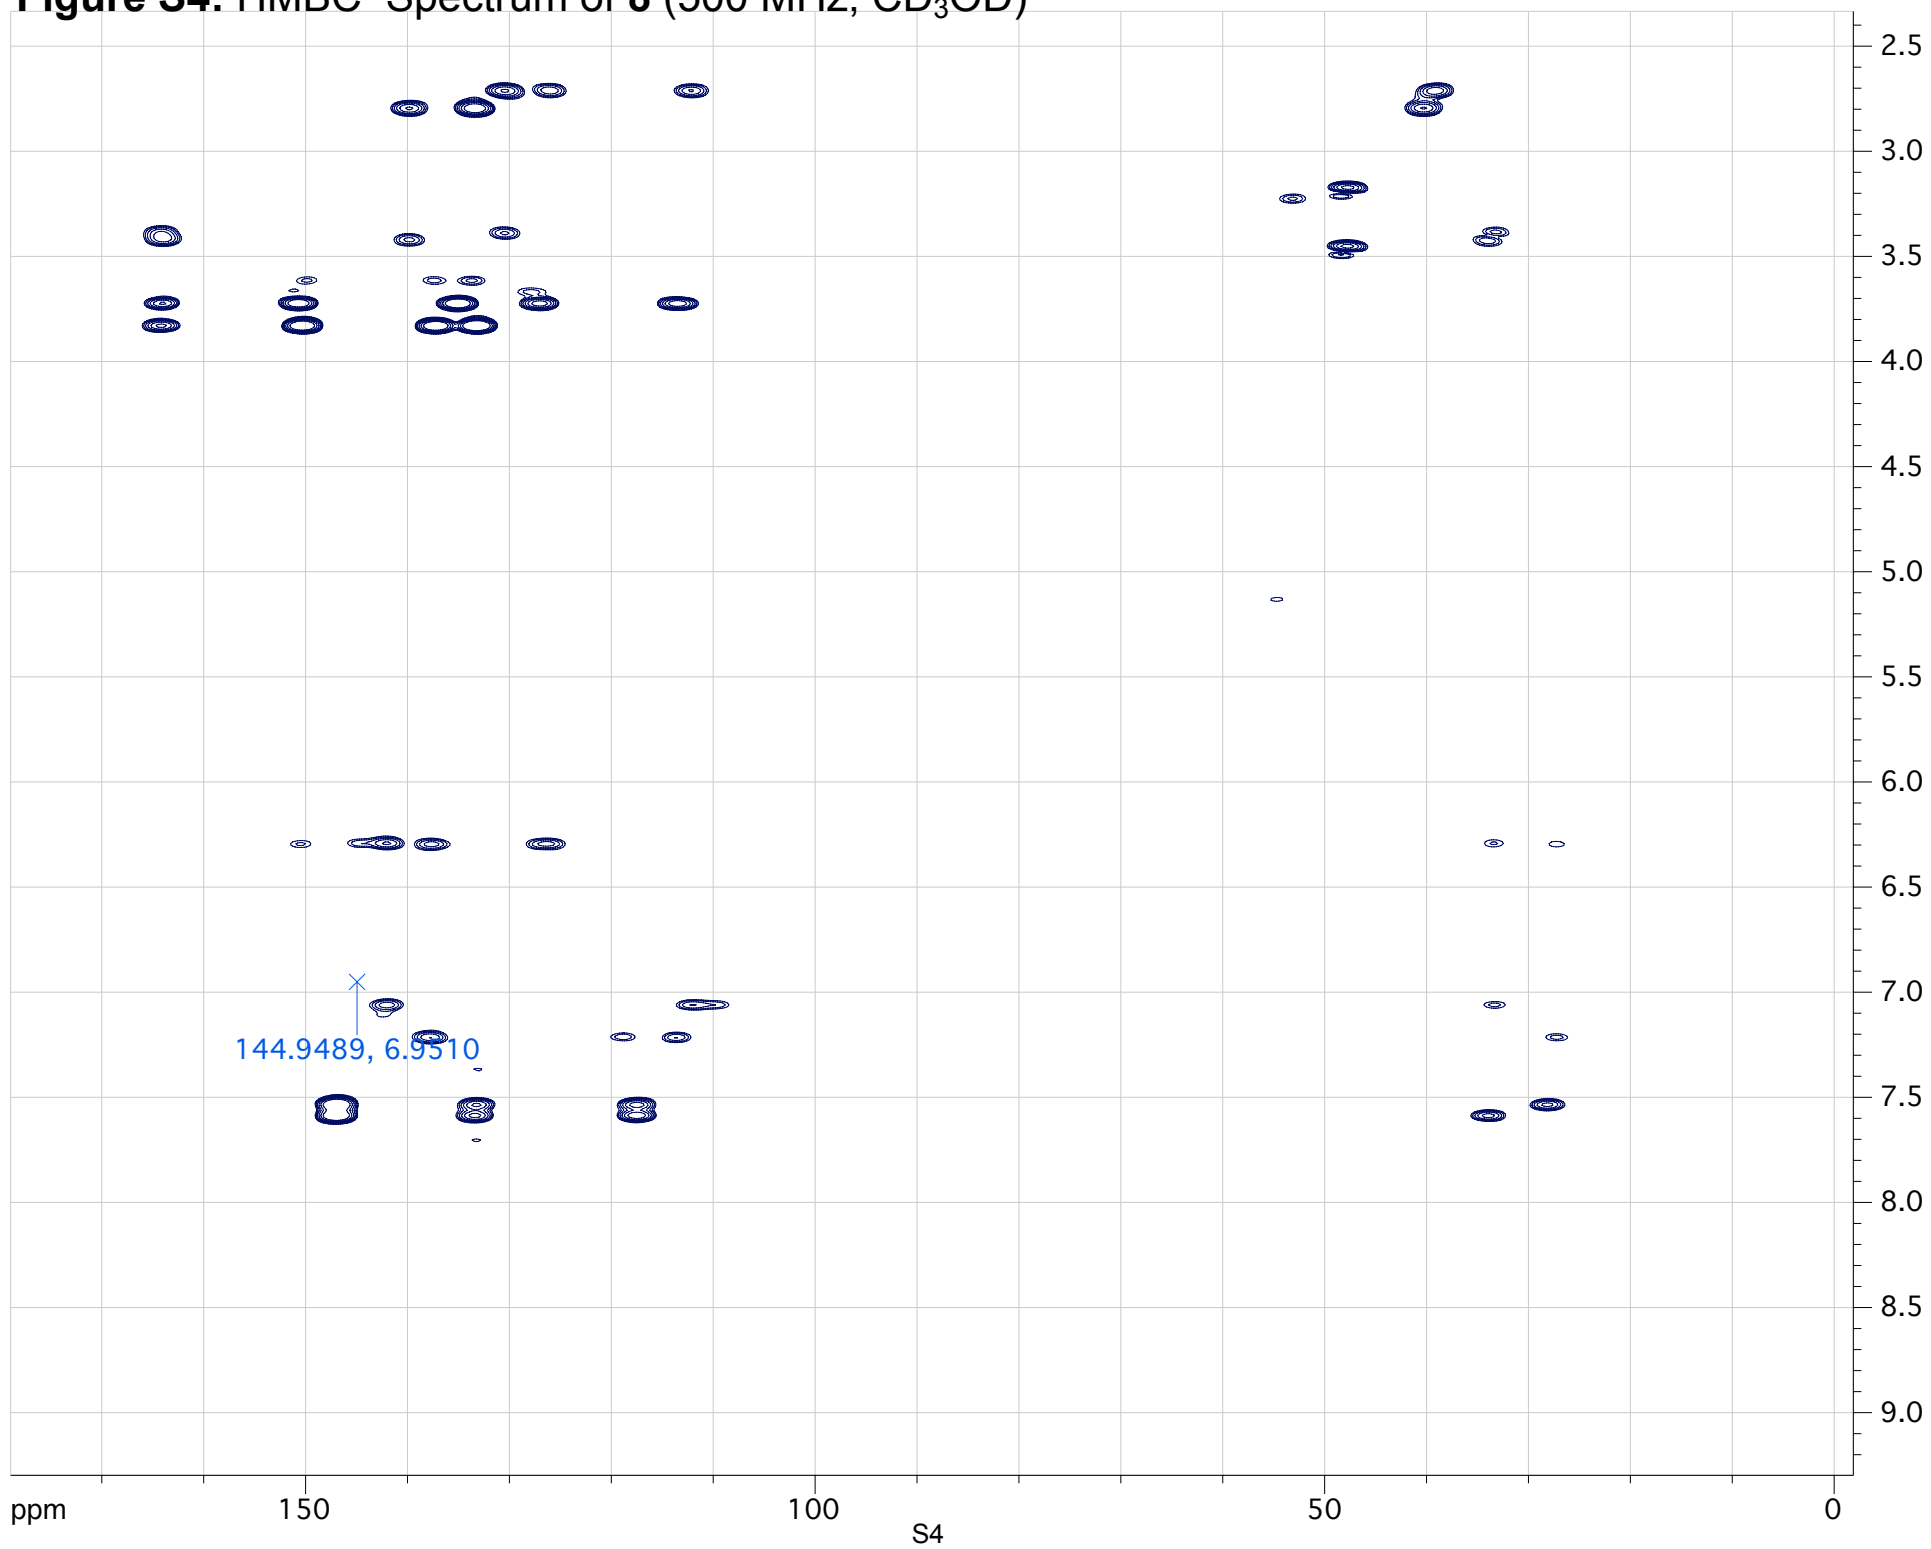

**Figure S5:**  $^1\text{H}$  NMR Spectrum of **8** (500 MHz,  $\text{CD}_3\text{CN}$ )

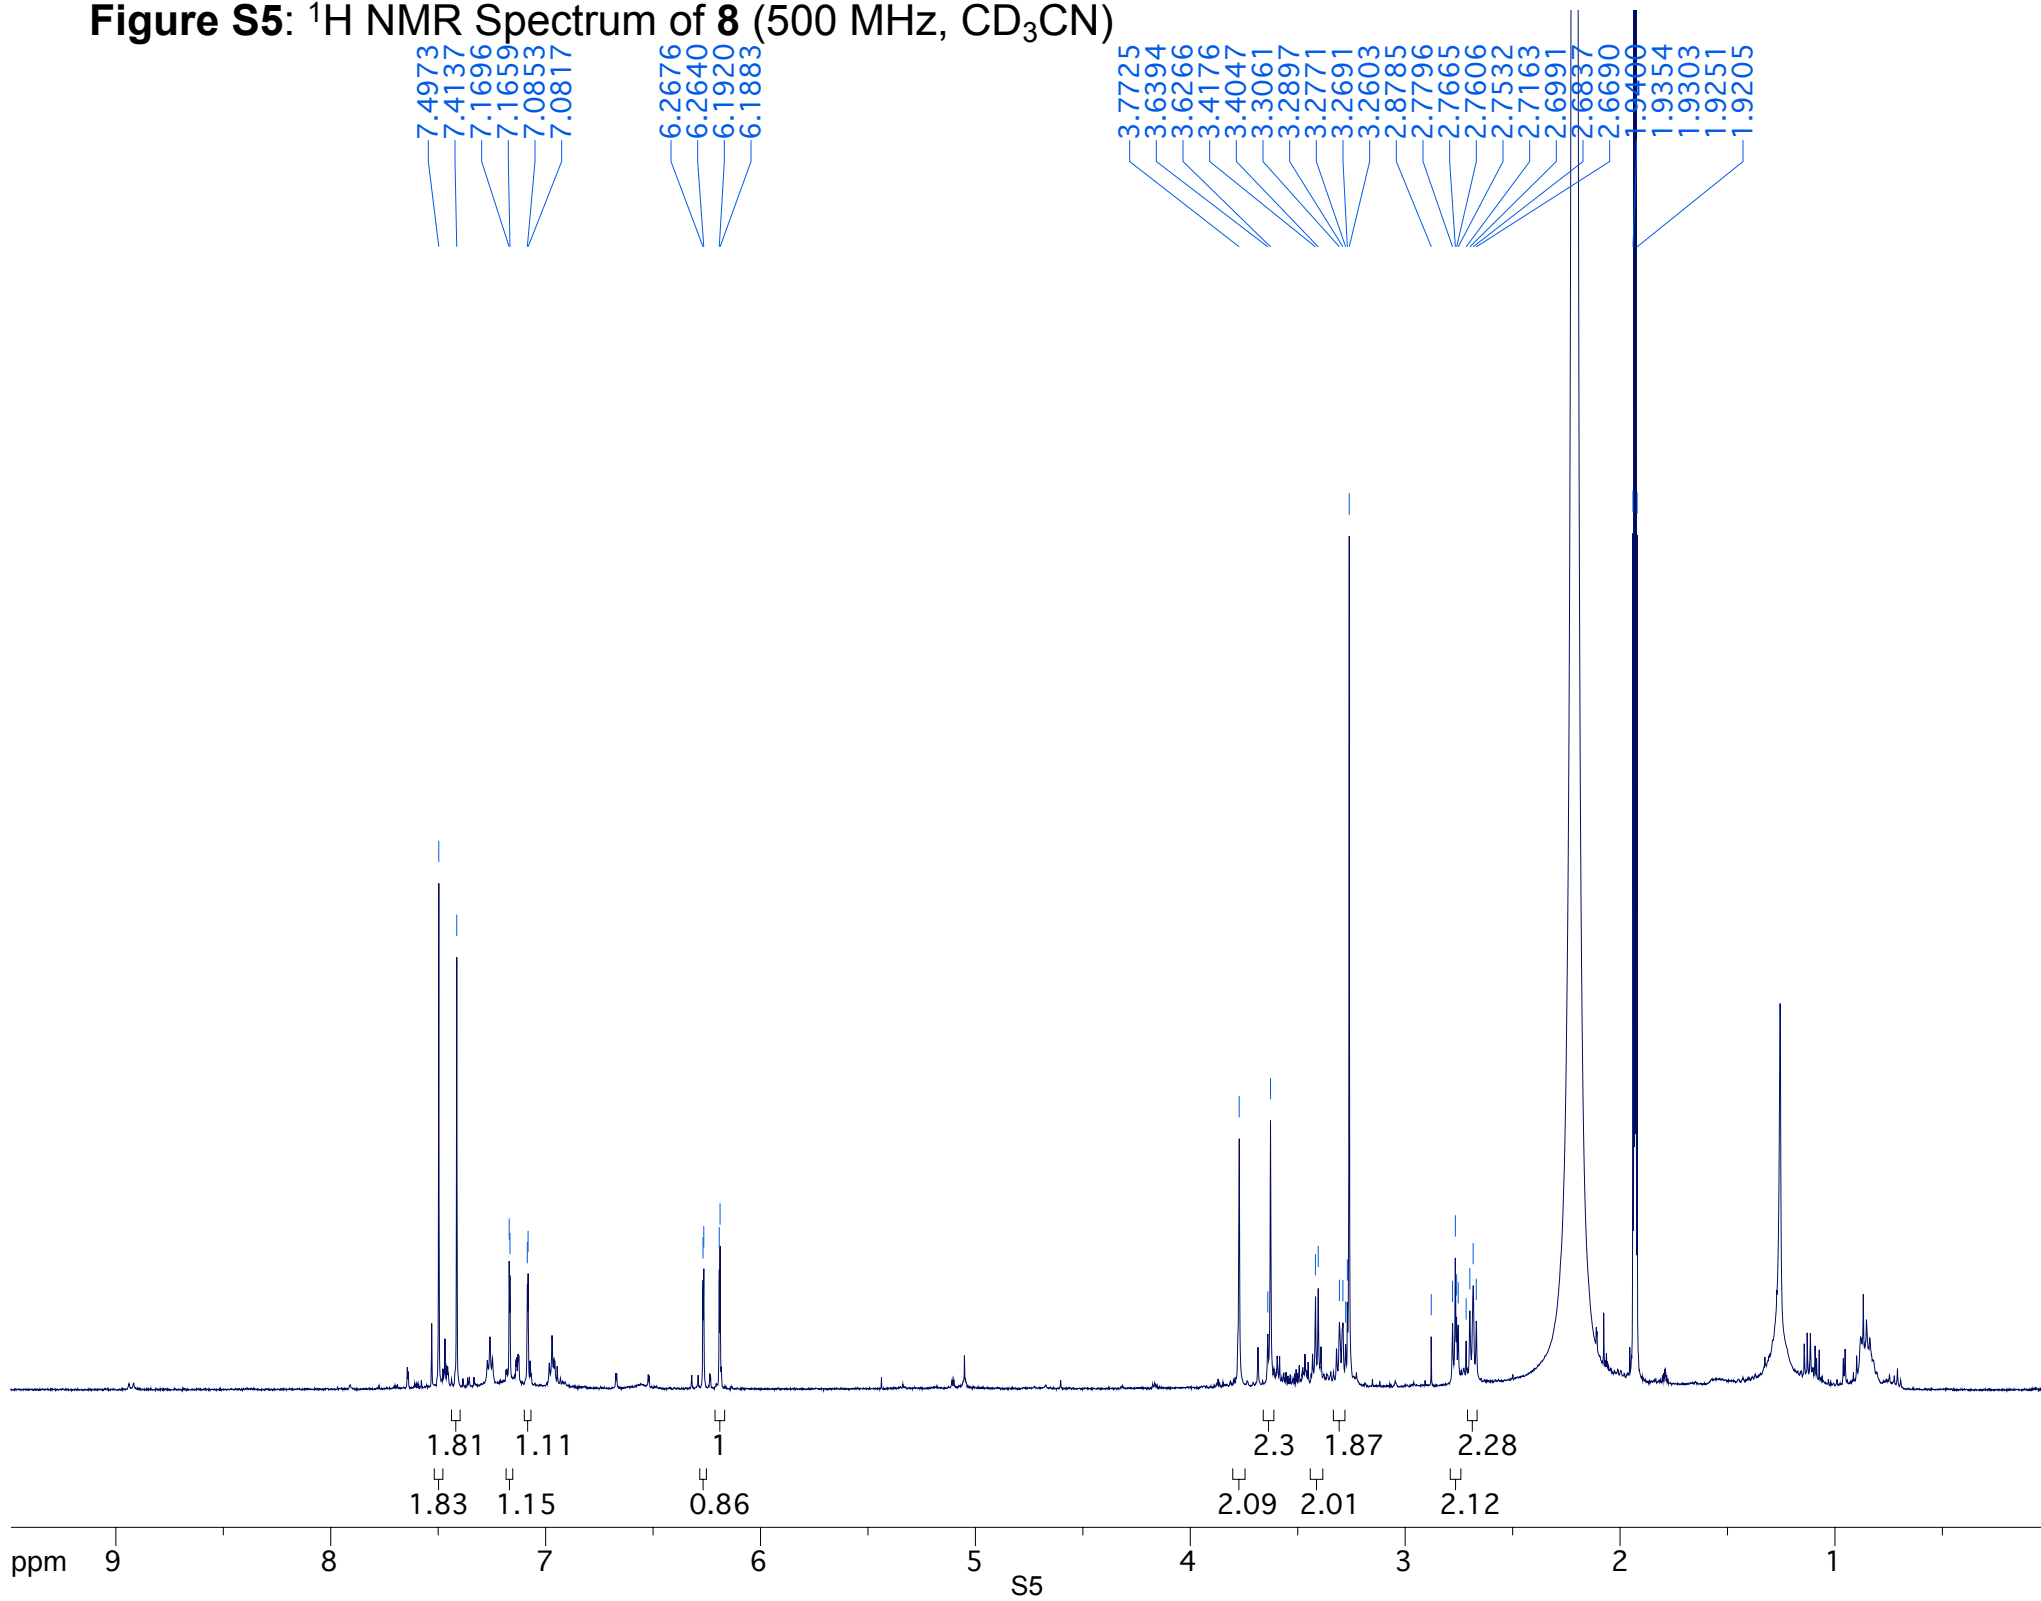

**Figure S5:** HMBC NMR Spectrum of **8** (500 MHz, CD<sub>3</sub>CN)

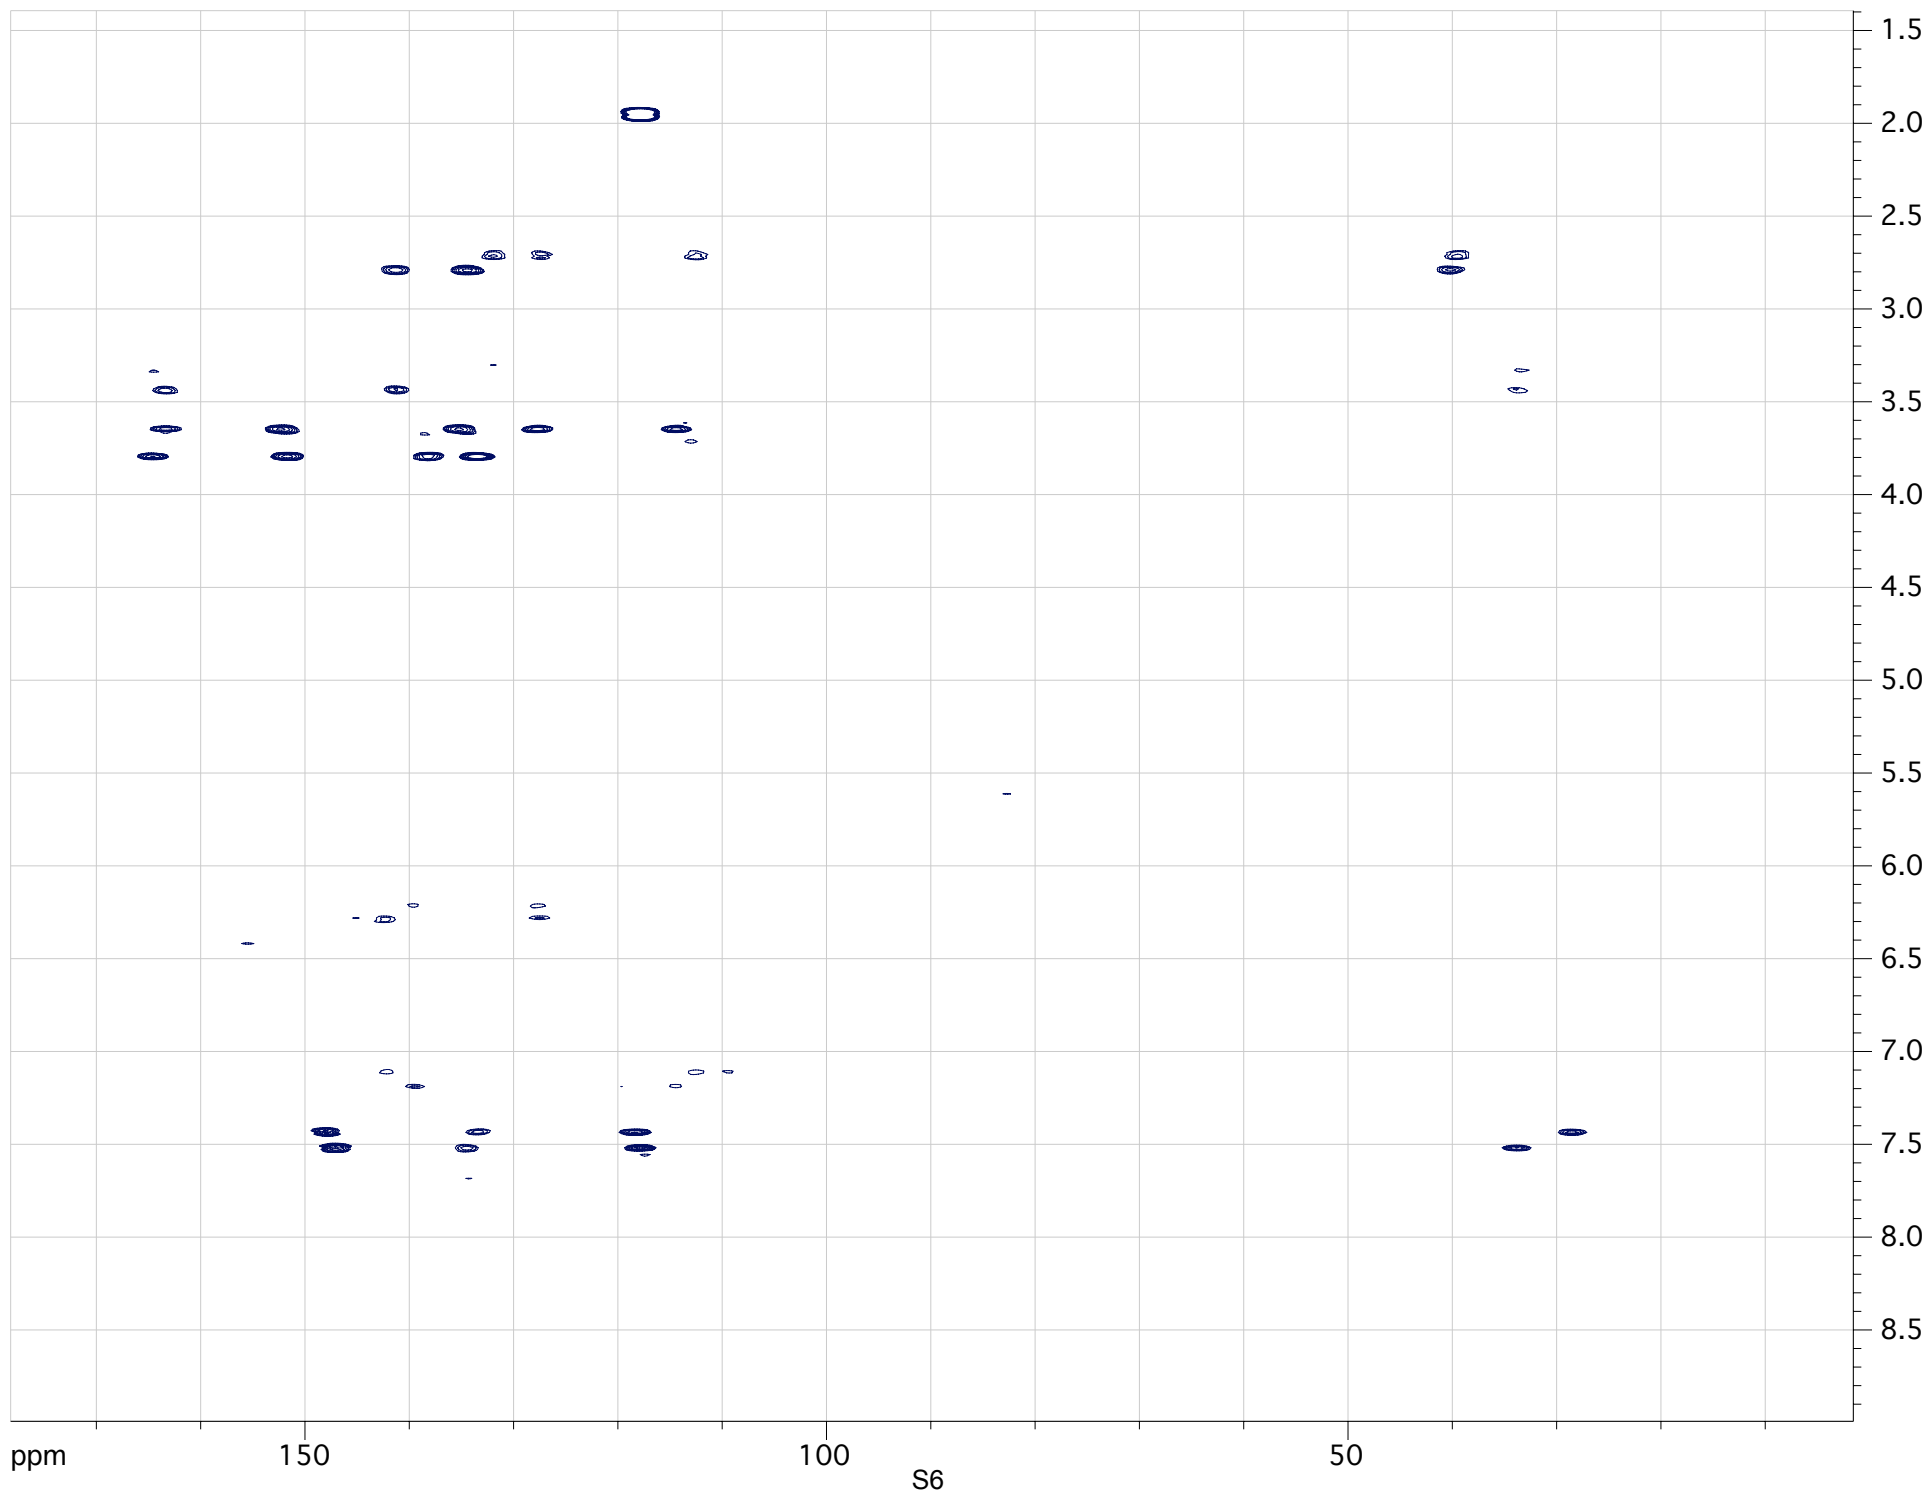

**Figure S7: FTIR Spectrum of 8**

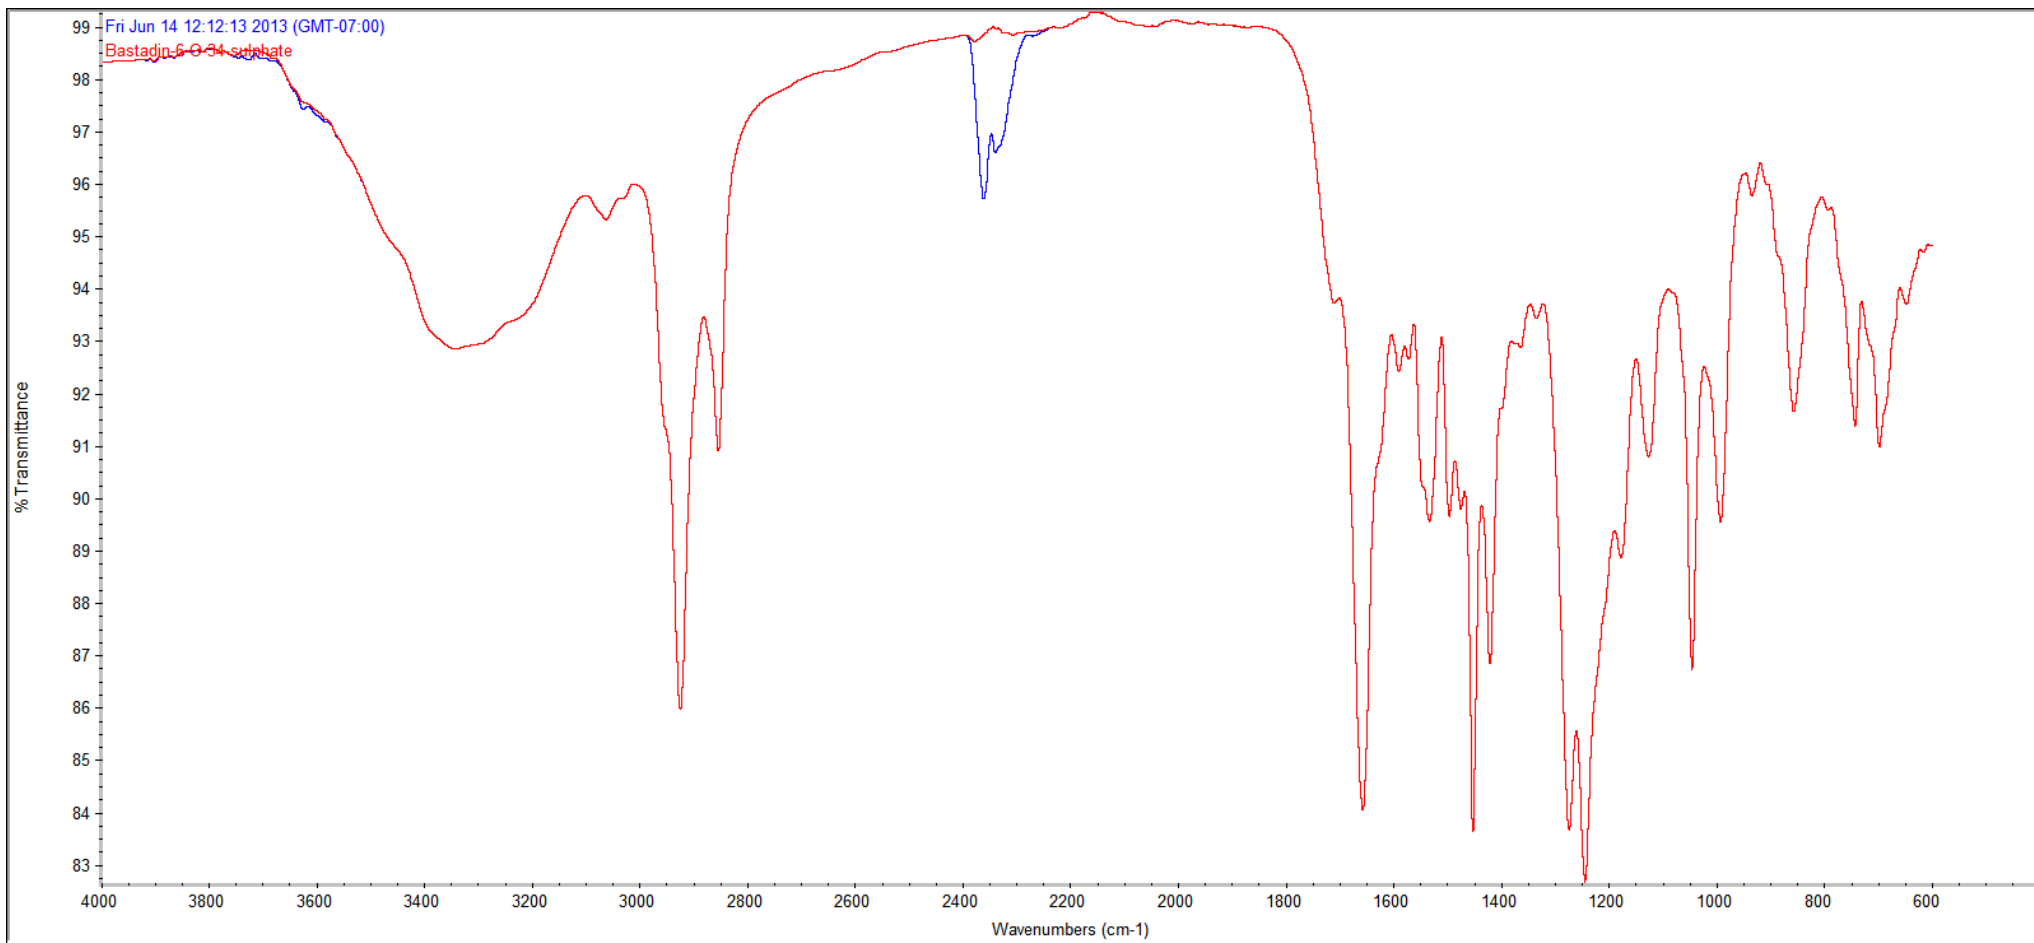



# Figure S8: EIMS Spectrum of 8

05302013-9eims-a #62-73 RT: 1.33-1.57 AV: 12 SB: 3 1.10-1.14 NL: 4.90E6  
T: + c EI Full ms [99.50-1200.50]

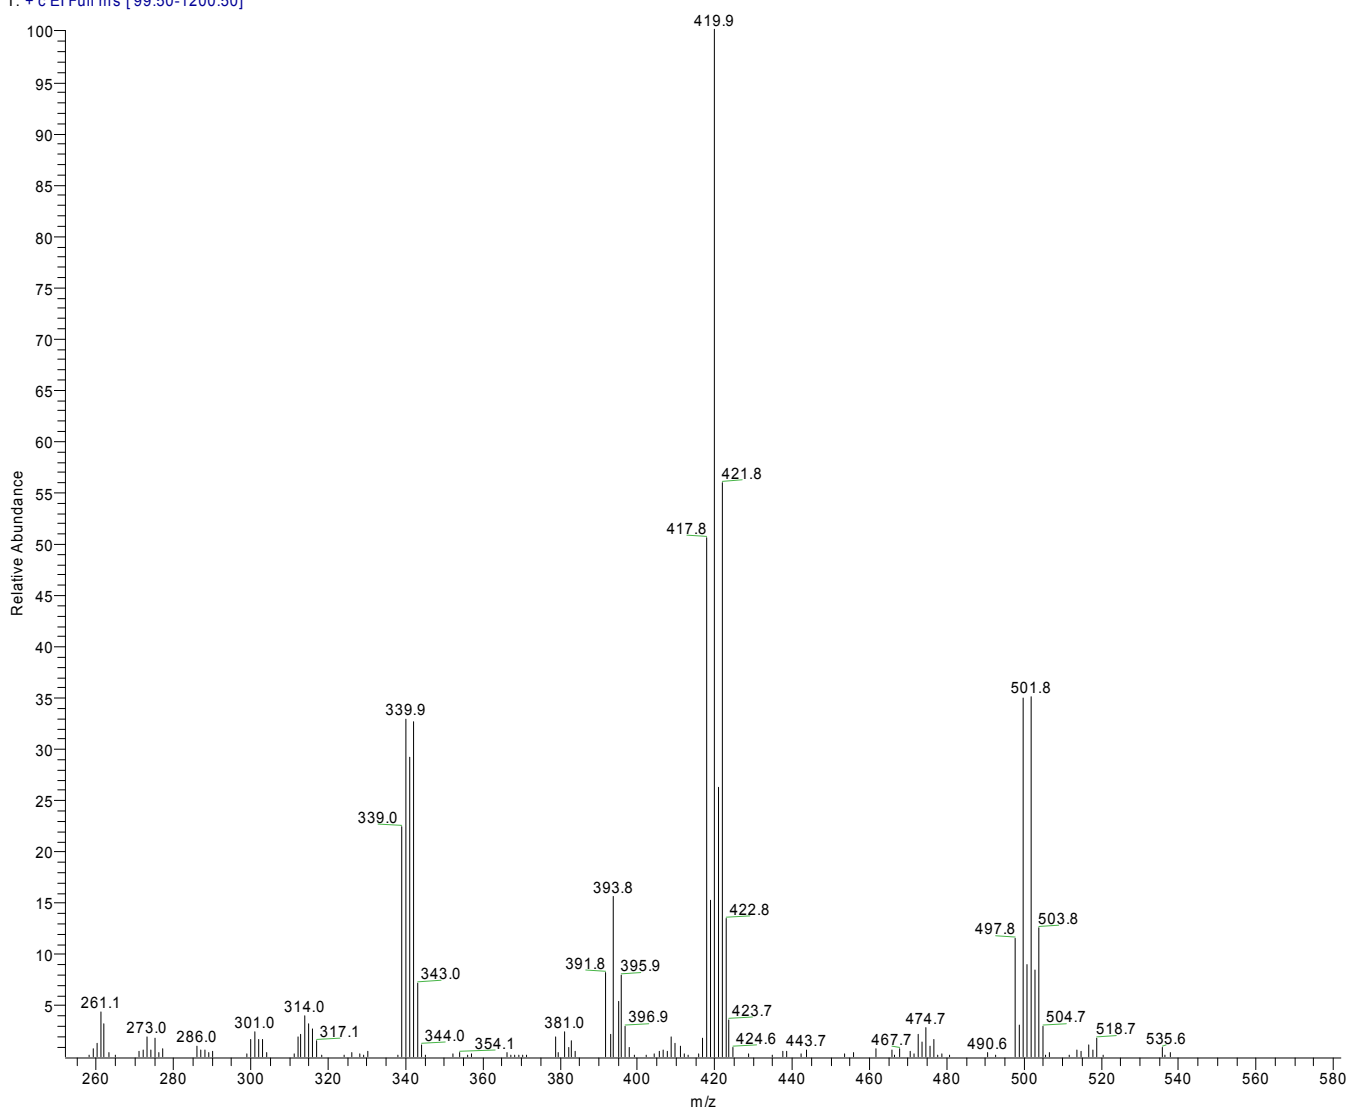

Figure S9. MALDI LRMS Spectrum of 8.

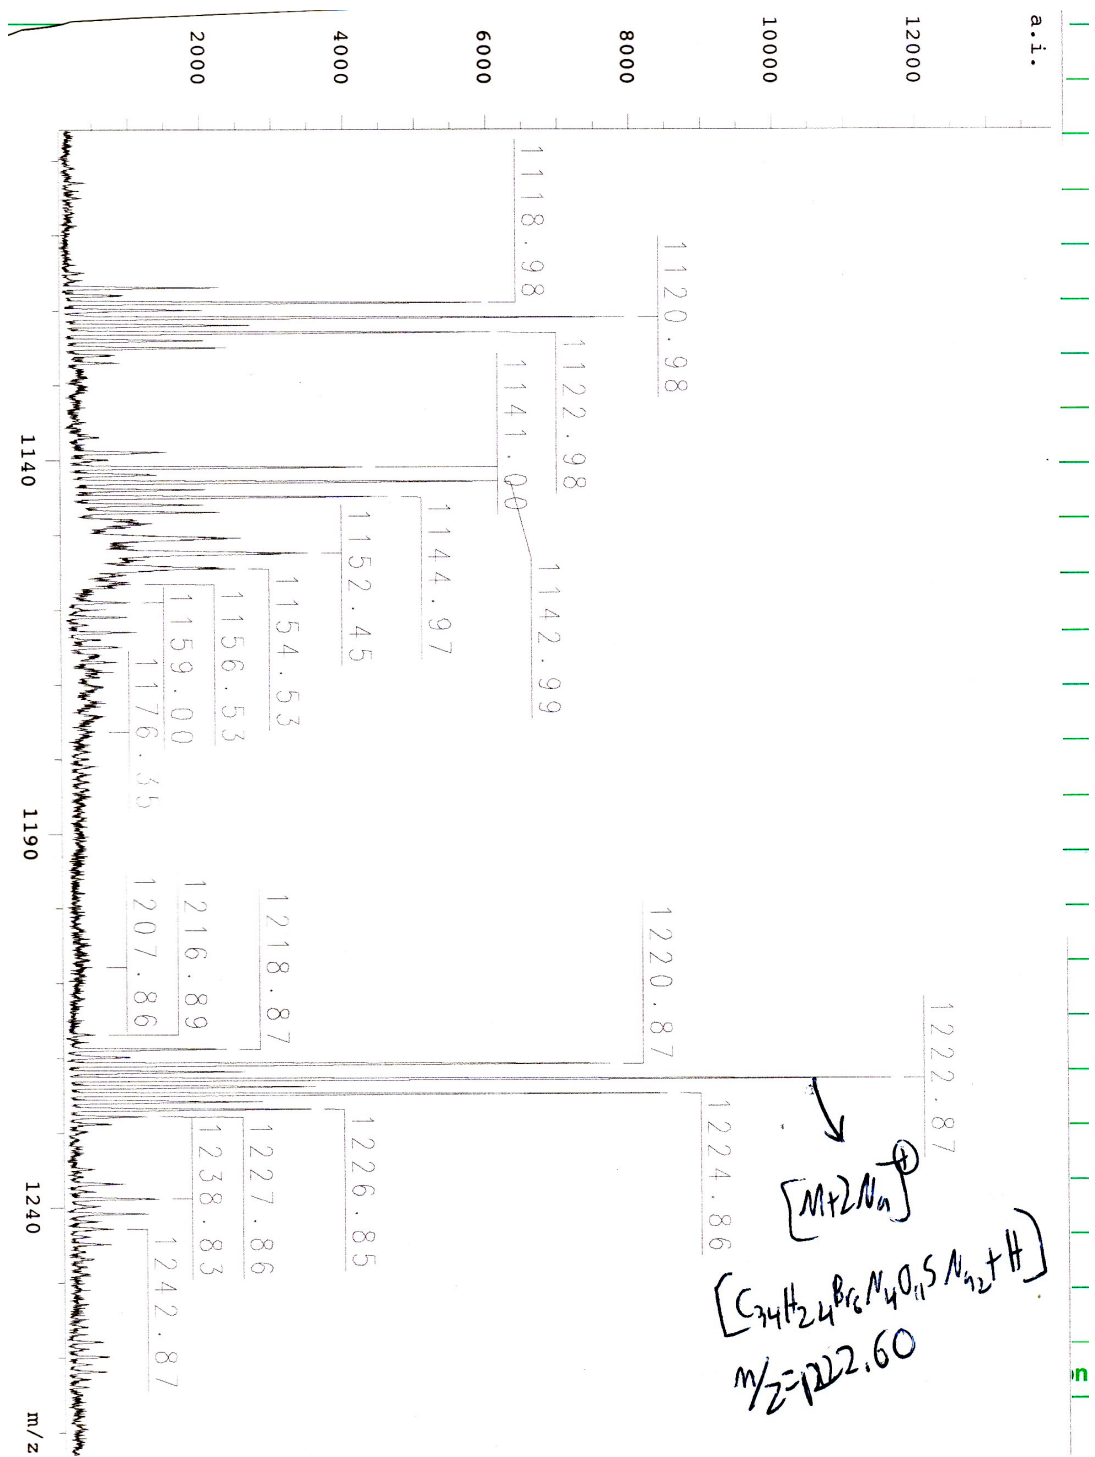

**Figure S10:** (a). UV-vis spectrum Bastadin-5 (**5**) from LCMS DAD detector (CH<sub>3</sub>CN-H<sub>2</sub>O-0.1% TFA)

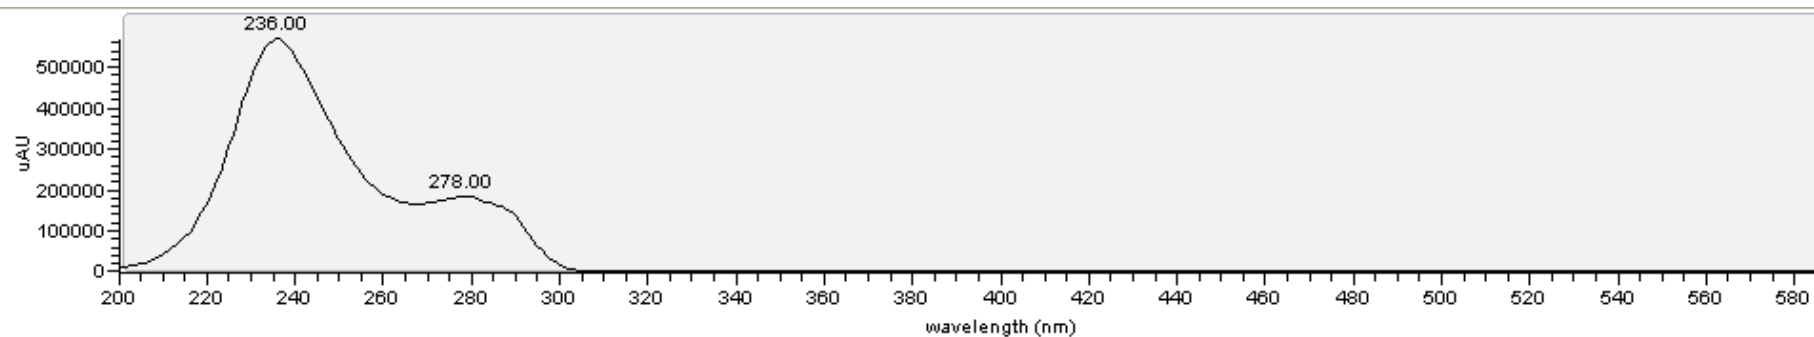

(b). UV-vis spectrum Bastadin-4 (**4**) from LCMS DAD detector

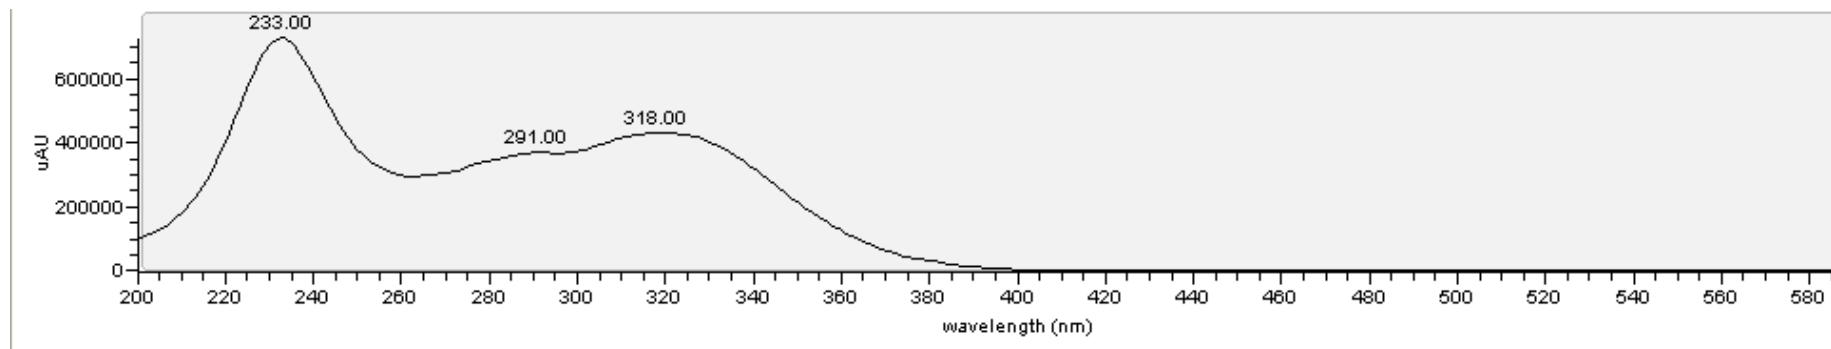

Supplement: NIHMS1008483-supplement-Supporting_Info.pdf [file NIHMS1008483-supplement-Supporting_Info.pdf]
